# Supplementary material for: Energy demands in high-intensity intermittent taekwondo specific exercises
Source: PeerJ. 2022 Aug 24;10:e13654. doi: 10.7717/peerj.13654 (PMC9419715; doi:10.7717/peerj.13654)
Supplement: Supplemental Information 1 — Individual and group data of energetic contributions after different HIIT taekwondo protocols [file peerj-10-13654-s001.xlsx]

## Sheet: Energy contributions by round
	PROTOCOL 15-10-5
	Subjects	ROUND 1													ROUND 2													ROUND 3													MEAN (%) - TOTAL Kcal/KJ/LO2
		Aerobic				ATP-CP				Glicolisys					Aerobic				ATP-CP				Glicolisys					Aerobic				ATP-CP				Glicolisys					Aerobic				ATP-CP				Glicolisys
		%	Kcal	KJ	LO2	%	Kcal	KJ	LO2	%	Kcal	KJ	LO2		%	Kcal	KJ	LO2	%	Kcal	KJ	LO2	%	Kcal	KJ	LO2		%	Kcal	KJ	LO2	%	Kcal	KJ	LO2	%	Kcal	KJ	LO2		%	Kcal	KJ	LO2	%	Kcal	KJ	LO2	%
	Subject 1	38.2	15.1	63.2	3	49.2	19.4	81.3	3.9	12.7	5	21	1		65.4	24.1	100.6	4.8	27	9.9	41.5	2	7.7	2.8	11.8	0.6		69.9	23.7	99.1	4.7	29	9.8	41.2	2	1	0.3	1.5	0.1		57.8333	62.9	262.9	12.5	35.0667	39.1	164	7.9	7.13333
	Subject 2	38.8	13.8	57.6	2.8	51.3	18.2	76.2	3.6	9.9	3.5	14.7	0.7		48.4	21	87.7	4.2	45.5	19.7	82.4	3.9	6.2	2.7	11.2	0.5		55.5	24.8	103.9	5	41	18.3	76.7	3.7	3.5	1.6	6.6	0.3		47.5667	59.6	249.2	12	45.9333	56.2	235.3	11.2	6.53333
	Subject 3	36.8	16.2	67.6	3.2	53.9	23.7	99.1	4.7	9.4	4.1	17.3	0.8		50.8	21.4	89.4	4.3	45.4	19.1	79.9	3.8	3.8	1.6	6.7	0.3		61.6	31.9	133.5	6.4	34.2	17.7	74.1	3.5	4.2	2.2	9	0.4		49.7333	69.5	290.5	13.9	44.5	60.5	253.1	12	5.8
	Subject 4	32.5	19	79.5	3.8	57.5	33.6	140.6	6.7	10	5.8	24.5	1.2		42.1	27.8	116.2	5.6	51.3	33.9	141.8	6.8	6.6	4.3	18.1	0.9		46.4	29.2	122.2	5.8	53.2	33.5	140.1	6.7	0.4	0.3	1.2	0.1		40.3333	76	317.9	15.2	54	101	422.5	20.2	5.66667
	Subject 5	38.2	9.6	40.3	1.9	46.2	11.7	48.8	2.3	15.6	4	16.5	0.8		57	17	71.2	3.4	39	11.6	48.7	2.3	4	1.2	5	0.2		61.2	18.4	76.9	3.7	37.5	11.3	47.2	2.3	1.3	0.4	1.6	0.1		52.1333	45	188.4	9	40.9	34.6	144.7	6.9	6.96667
	Subject 6	37.5	10	41.6	2	50.6	13.4	56.2	2.7	11.8	3.1	13.1	0.6		51.1	19.2	80.2	3.8	47.5	17.8	74.5	3.6	1.4	0.5	2.2	0.1		51.4	20.5	85.8	4.1	44.8	17.9	74.8	3.6	3.8	1.5	6.4	0.3		46.6667	49.7	207.6	9.9	47.6333	49.1	205.5	9.9	5.66667
	Subject 7	39.9	13.8	57.7	2.8	39.7	13.7	57.4	2.7	20.4	7	29.5	1.4		59.5	21	87.7	4.2	38.4	13.5	56.6	2.7	2.1	0.7	3.1	0.1		51.8	17.4	72.7	3.5	47.2	15.9	66.4	3.2	1	0.3	1.4	0.1		50.4	52.2	218.1	10.5	41.7667	43.1	180.4	8.6	7.83333
	Subject 8	38.1	13	54.5	2.6	51.6	17.6	73.6	3.5	10.3	3.5	14.7	0.7		50.2	23.6	98.6	4.7	45.3	21.3	89	4.3	4.5	2.1	8.9	0.4		55	25.3	105.7	5.1	42.1	19.3	80.9	3.9	2.9	1.3	5.5	0.3		47.7667	61.9	258.8	12.4	46.3333	58.2	243.5	11.7	5.9
	Subject 9	38.7	15.3	64.2	3.1	47	18.6	78	3.7	14.4	5.7	23.9	1.1		51.7	22.5	94.2	4.5	44	19.2	80.3	3.8	4.3	1.9	7.9	0.4		55.6	25.1	104.8	5	41	18.5	77.2	3.7	3.4	1.5	6.4	0.3		48.6667	62.9	263.2	12.6	44	56.3	235.5	11.2	7.36667
	MEAN	37.6333	13.9778	58.4667	2.8	49.6667	18.8778	79.0222	3.75556	12.7222	4.63333	19.4667	0.525		52.9111	21.9556	91.7556	4.38889	42.6	18.4444	77.1889	3.68889	4.51111	1.97778	8.32222	0.388889		56.4889	24.0333	100.511	4.81111	41.1111	18.0222	75.4	3.62222	2.38889	1.04444	4.4	0.222222		49.0111	59.9667	250.733	12	44.4593	55.3444	231.611	11.0667	6.54074
	STANDARD DEVIATION	2.10832	2.94057	12.312	0.589491	5.06508	6.6217	27.7045	1.32393	3.59123	1.31529	5.56192	0.268225		6.79971	3.08306	12.8602	0.627384	7.06364	7.0207	29.3145	1.40929	2.0521	1.18192	4.93604	0.257121		6.90859	4.74658	19.8898	0.943987	7.11784	6.69809	27.9937	1.32926	1.44866	0.72476	2.97279	0.120185		4.67152	9.73884	40.7346	1.94551	5.18577	19.3776	81.0089	3.86588	0.819515
	PROTOCOLO 100%
	NOMES	ROUND 1													ROUND 2													ROUND 3													MEAN
		Aerobic				ATP-CP				Glicolisys					Aerobic				ATP-CP				Glicolisys					Aerobic				ATP-CP				Glicolisys					Aerobic				ATP-CP				Glicolisys
		%	Kcal	KJ	LO2	%	Kcal	KJ	LO2	%	Kcal	KJ	LO2		%	Kcal	KJ	LO2	%	Kcal	KJ	LO2	%	Kcal	KJ	LO2		%	Kcal	KJ	LO2	%	Kcal	KJ	LO2	%	Kcal	KJ	LO2		%	Kcal	KJ	LO2	%	Kcal	KJ	LO2	%
	Subject 1	45.3	18	75.3	3.6	47	18.7	78.2	3.7	7.7	3.1	12.9	0.6		58	28.6	119.7	5.7	37.6	18.5	77.5	3.7	4.4	2.2	9.2	0.4		72.3	26.7	111.6	5.3	25.1	9.2	38.7	1.8	2.6	1	4	0.2		58.5333	73.3	306.6	14.6	36.5667	46.4	194.4	9.2	4.9
	Subject 2	51	17.6	73.7	3.5	42.5	14.7	61.4	2.9	6.4	2.2	9.3	0.4		58	25.3	105.9	5.1	38.6	16.9	70.5	3.4	3.4	1.5	6.2	0.3		61.1	27.4	114.6	5.5	35.7	16	67	3.2	3.1	1.4	5.9	0.3		56.7	70.3	294.2	14.1	38.9333	47.6	198.9	9.5	4.3
	Subject 3	49.8	21.2	88.9	4.2	42.9	18.3	76.5	3.7	7.3	3.1	13	0.6		56.3	25.4	106.4	5.1	40	18.1	75.6	3.6	3.7	1.7	7.1	0.3		58.6	25.3	105.9	5.1	40.1	17.3	72.4	3.5	1.3	0.5	2.3	0.1		54.9	71.9	301.2	14.4	41	53.7	224.5	10.8	4.1
	Subject 4	34.8	15.6	65.2	3.1	61.3	27.4	114.6	5.5	3.9	1.7	7.3	0.3		50.1	29.1	121.8	5.8	46	26.7	111.7	5.3	3.8	2.2	9.3	0.4		51.3	32.8	137.4	6.6	44.8	28.7	120.1	5.7	3.9	2.5	10.4	0.5		45.4	77.5	324.4	15.5	50.7	82.8	346.4	16.5	3.86667
	Subject 5	43.5	13.2	55.1	2.6	52.1	15.8	66	3.2	4.5	1.4	5.7	0.3		52.8	19.1	79.8	3.8	45.2	16.3	68.3	3.3	2	0.7	3	0.1		57.9	21.9	91.7	4.4	40.2	15.2	63.7	3	1.9	0.7	3	0.1		51.4	54.2	226.6	10.8	45.8333	47.3	198	9.5	2.8
	Subject 6	38	13.5	56.7	2.7	51.5	18.4	76.9	3.7	10.5	3.7	15.6	0.7		55.1	23.4	97.7	4.7	43	18.2	76.3	3.6	1.9	0.8	3.4	0.2		53.2	23.5	98.5	4.7	44.2	19.5	81.8	3.9	2.6	1.2	4.8	0.2		48.7667	60.4	252.9	12.1	46.2333	56.1	235	11.2	5
	Subject 7	45.1	14.5	60.5	2.9	48.5	15.5	65	3.1	6.4	2	8.5	0.4		52.6	18.9	79	3.8	42.9	15.4	64.5	3.1	4.5	1.6	6.8	0.3		55.6	20.8	87.1	4.2	41.8	15.7	65.6	3.1	2.6	1	4.1	0.2		51.1	54.2	226.6	10.9	44.4	46.6	195.1	9.3	4.5
	Subject 8	43.2	17.9	75.1	3.6	49.4	20.5	85.8	4.1	7.4	3.1	12.8	0.6		55.1	26.4	110.4	5.3	43.3	20.7	86.7	4.1	1.6	0.8	3.2	0.2		56.7	29.2	122	5.8	38.9	20	83.8	4	4.4	2.2	9.4	0.5		51.6667	73.5	307.5	14.7	43.8667	61.2	256.3	12.2	4.46667
	Subject 9	43.6	18.2	76.2	3.6	47	19.6	82	3.9	9.4	3.9	16.4	0.8		56.7	29.7	124.4	5.9	38.7	20.3	84.8	4.1	4.6	2.4	10	0.5		60.1	29.1	121.9	5.8	36.6	17.7	74.1	4.5	3.3	1.6	6.7	0.3		53.4667	77	322.5	15.3	40.7667	57.6	240.9	12.5	5.76667
	MEAN	43.8111	16.6333	69.6333	3.31111	49.1333	18.7667	78.4889	3.75556	7.05556	2.68889	11.2778	0.522222		54.9667	25.1	105.011	5.02222	41.7	19.0111	79.5444	3.8	3.32222	1.54444	6.46667	0.3		58.5333	26.3	110.078	5.26667	38.6	17.7	74.1333	3.63333	2.85556	1.34444	5.62222	0.266667		52.437	68.0333	284.722	13.6	43.2	55.4778	232.167	11.1889	4.41111
	STANDARD DEVIATION	5.08563	2.62059	11.0364	0.520683	5.64424	3.78484	15.8363	0.763399	2.10066	0.890849	3.73155	0.17873		2.67395	4.00874	16.8484	0.791798	3.05655	3.35836	14.043	0.653835	1.18825	0.655956	2.75363	0.122474		6.03842	3.84578	16.0795	0.761577	5.91185	5.18507	21.6686	1.08858	0.952774	0.663534	2.78109	0.15		4.01423	9.27847	38.938	1.83644	4.28965	11.6053	48.54	2.35396	0.824284
	PROTOCOLO 35-5
	NOMES	ROUND 1													ROUND 2													ROUND 3													MÉDIA
		Aerobic				ATP-CP				Glicolisys					Aerobic				ATP-CP				Glicolisys					Aerobic				ATP-CP				Glicolisys					Aerobic				ATP-CP				Glicolisys
		%	Kcal	KJ	LO2	%	Kcal	KJ	LO2	%	Kcal	KJ	LO2		%	Kcal	KJ	LO2	%	Kcal	KJ	LO2	%	Kcal	KJ	LO2		%	Kcal	KJ	LO2	%	Kcal	KJ	LO2	%	Kcal	KJ	LO2		%	Kcal	KJ	LO2	%	Kcal	KJ	LO2	%
	Subject 1	47.9	14.5	60.5	2.9	47.7	14.4	60.2	2.9	4.4	1.3	5.6	0.3		58.3	21.9	91.5	4.4	39.1	14.7	61.4	2.9	2.7	1	4.2	0.2		57.1	21.9	91.5	4.4	41.7	16	66.9	3.2	1.2	0.5	1.9	0.1		54.4333	58.3	243.5	11.7	42.8333	45.1	188.5	9	2.76667
	Subject 2	37.8	9.6	40.2	1.9	54.7	13.9	58.2	2.8	7.5	1.9	8	0.4		56.2	22.7	95	4.5	33.5	13.5	56.7	2.7	10.3	4.2	17.4	0.8		61.4	22.8	95.2	4.6	37	13.7	57.4	2.7	1.6	0.6	2.5	0.1		51.8	55.1	230.4	11	41.7333	41.1	172.3	8.2	6.46667
	Subject 3	25.5	12	50.2	2.4	67.1	31.6	132.3	6.3	7.4	3.5	14.5	0.7		46.8	20.8	86.9	4.2	50.8	22.5	94.3	4.5	2.4	1.1	4.4	0.2		44.4	21.6	90.5	4.3	46.4	22.6	94.6	4.5	9.2	4.5	18.9	0.9		38.9	54.4	227.6	10.9	54.7667	76.7	321.2	15.3	6.33333
	Subject 4	24	10.7	44.6	2.1	69.2	30.8	128.8	6.2	6.8	3	12.7	0.6		39.5	26.5	110.7	5.3	57	38.2	159.7	7.6	3.4	2.3	9.6	0.5		49.7	27.4	114.8	5.5	48	26.5	111	5.3	2.3	1.2	5.2	0.3		37.7333	64.6	270.1	12.9	58.0667	95.5	399.5	19.1	4.16667
	Subject 5	32.2	6.3	26.5	1.3	63.7	19.7	82.5	3.9	4.1	0.8	3.4	0.2		52.4	14.2	59.3	2.8	45.8	12.4	51.8	2.5	1.8	0.5	2	0.1		55.5	15.4	64.6	3.1	43.7	12.2	50.9	2.4	0.8	0.2	0.9	0.04		46.7	35.9	150.4	7.2	51.0667	44.3	185.2	8.8	2.23333
	Subject 6	37.9	12.5	52.2	2.5	50.1	16.5	68.9	3.3	12	4	16.5	0.8		45.6	21.7	90.8	4.3	48.1	22.9	95.7	4.6	6.3	3	12.6	0.6		48.5	21.8	91.4	4.4	50.4	22.7	95	4.5	1.1	0.5	2	0.1		44	56	234.4	11.2	49.5333	62.1	259.6	12.4	6.46667
	Subject 7	34.5	11.4	47.9	2.3	58	20.8	87.1	4.2	7.5	2.5	11.1	0.5		50.8	22.6	94.7	4.5	44.1	20.4	85.3	4.1	5.1	2.3	9.8	0.5		53.8	23.1	96.8	4.6	43.9	19.2	80.2	3.8	2.3	1	4.3	0.2		46.3667	57.1	239.4	11.4	48.6667	60.4	252.6	12.1	4.96667
	Subject 8	41.9	16.7	69.5	3.3	49.2	19.5	81.6	3.9	8.9	3.5	14.7	0.7		53.7	25.2	105.6	5	41	19.3	80.6	3.9	5.3	2.5	10.4	0.5		54.7	24.2	101.2	4.8	43.7	19.3	80.9	3.9	1.6	0.7	2.9	0.1		50.1	66.1	276.3	13.1	44.6333	58.1	243.1	11.7	5.26667
	Subject 9	28.8	9.4	39.4	1.9	61.7	20.2	84.5	4	9.5	3.1	12.9	0.6		54.1	28.1	117.5	5.6	37.9	19.7	82.3	3.9	8	4.2	17.4	0.8		59.3	29.9	125.1	6	40.2	20.3	84.7	4.1	0.5	0.3	1.1	0.1		47.4	67.4	282	13.5	46.6	60.2	251.5	12	6
	MEAN	34.5	11.4556	47.8889	2.28889	57.9333	20.8222	87.1222	4.16667	7.56667	2.62222	11.0444	0.533333		50.8222	22.6333	94.6667	4.51111	44.1444	20.4	85.3111	4.07778	5.03333	2.34444	9.75556	0.466667	#DIV/0!	53.8222	23.1222	96.7889	4.63333	43.8889	19.1667	80.1778	3.82222	2.28889	1.05556	4.41111	0.215556	#DIV/0!	46.3	57.2111	239.344	11.4333	48.6556	60.3889	252.611	12.0667	4.96296
	STANDARD DEVIATION	7.79262	3.02039	12.4974	0.588312	7.9939	6.39292	26.7632	1.27867	2.4454	1.08487	4.45256	0.2		5.89487	3.98936	16.7114	0.800694	7.20748	7.69172	32.1462	1.52871	2.82223	1.3277	5.53514	0.254951	#DIV/0!	5.42973	4.0419	16.8841	0.807775	4.05476	4.57985	19.2061	0.925713	2.66291	1.32958	5.61147	0.267727	#DIV/0!	5.54069	9.3982	39.214	1.86145	5.41662	17.2181	72.0466	3.44964	1.59986
[truncated: 3 more columns]

## Sheet: Metabolics
			M1	M2		M3		M4		M5
		PROTOCOL 15-10-5
			Blood Lactate												UREA				CREATININE			RPE
			PRÉ	PÓS R1	Delta	PÓS R2	Delta	PÓS R3	Delta	PICO	3' PÓS	5' PÓS	7' PÓS		PRÉ	PÓS			PRÉ	PÓS
		Subject 1	1.335	6.93	5.595	10.08	3.15	9.36	-0.72	9.39	9.39	7.5	7.32		24.7	24.5			0.861	1.06		7
		Subject 2	0.783	4.53	3.747	7.38	2.85	9.06	1.68	9.06	7.8	7.47	6.87		32.8	27			1.22	1.1		9
		Subject 3	0.789	4.17	3.381	5.49	1.32	7.17	1.68	7.26	7.26	7.11	7.08		29	34.3			1.2	0.934		7
		Subject 4	0.822	5.04	4.218	8.16	3.12	7.95	-0.21	7.95	7.56	7.35	6.3		32.7	33.9			0.9	1.46		8
		Subject 5	1.668	7.26	5.592	8.94	1.68	8.55	-0.39	8.55	8.28	7.98			21.5	23.9			1.08	1.22		7
		Subject 6	0.732	4.53	3.798	5.16	0.63	7.02	1.86	7.02	5.91	5.07	5.16		28.8	30			0.848	0.926		8
		Subject 7	1.083	9.15	8.067	8.31	-0.84	7.92	-0.39	8.58	8.58	7.59	6.93		28.7	31.7			0.723	0.849		9
		Subject 8	0.969	4.44	3.471	6.54	2.1	7.8	1.26	7.8	6.66	6.15	5.67		20	22.9			0.872	1.12		8
		Subject 9	0.909	6.27	5.361	8.04	1.77	9.48	1.44	9.48	8.58	8.37	7.86		24.6	26.4			0.985	1.23		9
		MEAN	1.01	5.81333	4.80333	7.56667	1.75333	8.25667	0.69	8.34333	7.78	7.17667	6.64875		26.9778	28.2889			0.965444	1.09989		8
		SD	0.31	1.70148	1.51981	1.60176	1.29045	0.906325	1.08094	0.892651	1.07195	0.997334	0.888634		4.56283	4.33112			0.16949	0.188326		0.866025
		PROTOCOL 100%
			Blood Lactate												UREA				CREATININE			RPE
			PRÉ	PÓS R1	Delta	PÓS R2	Delta	PÓS R3	Delta	PICO	3' PÓS	5' PÓS	7' PÓS		PRÉ	PÓS			PRÉ	PÓS
		Subject 1	1.335	4.77	3.435	7.23	2.46	8.31	1.08	8.31	7.47	6.18	5.76		22.9	20			0.783	0.648		6
		Subject 2	0.87	3.24	2.37	4.83	1.59	6.33	1.5	6.33	5.88	5.49	4.26		20.6	24.5			0.888	0.5		7.3
		Subject 3	1.542	4.08	2.538	5.46	1.38	5.91	0.45	5.91	5.16	5.01	4.9		30.4	37.8			0.954	1.07		9
		Subject 4	0.765	2.022	1.257	3.63	1.608	4.2	0.57	5.43	5.43	4.74	4.02		32.9	32.6			1.03	1.17		7
		Subject 5	0.657	2.571	1.914	3.6	1.029	4.62	1.02	4.62	2.835	2.322	1.986		22.9	25			0.827	0.906		8
		Subject 6	0.567	5.1	4.533	6.09	0.99	7.41	1.32	7.41	7.23	6.21	5.49		21.4	20			0.635	0.743		7
		Subject 7	1.65	3.99	2.34	5.85	1.86	6.96	1.11	6.96	6.72	5.73	5.91		33	29.1			0.854	0.971		5
		Subject 8	1,4	4.38	2.98	5.13	0.75	7.35	2.22	7.35	6.69	6.66	5.31		23.5	28			0.934	0.5		8
		Subject 9	0.693	4.38	3.687	6.63	2.25	8.13	1.5	8.13	7.47	7.53	6.54		29.9	29.6			0.995	1.12		8
		MEAN	1.00987	3.837	2.78378	5.38333	1.54633	6.58	1.19667	6.71667	6.09833	5.54133	4.90844		26.3889	27.4			0.877778	0.847556		7.25556
		SD	0.430817	1.02416	0.990852	1.24057	0.578034	1.45082	0.530212	1.24142	1.49182	1.47428	1.35279		5.06963	5.77689			0.120963	0.259489		1.19907
		PROTOCOL 35-5
			Blood Lactate												UREA				CREATININE			RPE
			PRÉ	PÓS R1	Delta	PÓS R2	Delta	PÓS R3	Delta	PICO	3' PÓS	5' PÓS	7' PÓS		PRÉ	PÓS	DELTA		PRÉ	PÓS	DELTA
		Subject 1	0.84	2.331	1.491	3.45	1.119	3.96	0.51	3.96	3.42		2.088		26.9	21.1	-5.8		0.835	1.16	0.325	4
		Subject 2	1,3	3.3	2	7.77	4.47	8.4	0.63	8.4	8.13	7.95	7.11		22.1	23.3	1.2		0.942	1.03	0.088	8.5
		Subject 3	0.906	3.75	2.844	4.62	0.87	5.52	0.9	8.31	8.31	5.1	5.42		34.1	27.6	-6.5		0.802	1.28	0.478	7
		Subject 4	0.843	3.03	2.187	4.68	1.65	4.89	0.21	4.89	4.65	4.77	4.35		28.7	27.9	-0.8		1.04	1.19	0.15	7
		Subject 5	1.1	2.268	1.168	2.94	0.672	3.24	0.3	3.24	2.811	2.49	1.911		20	20.9	0.9		0.722	0.5	-0.222	7
		Subject 6	1.4	6.15	4.75	9.81	3.66	10.38	0.57	10.38	9.21	8.85	8.55		26.2	20	-6.2		0.805	0.924	0.119	7
		Subject 7	0.79	3.64	2.85	6	2.36	6.41	0.41	6.43	6.43				26.8	24.3	-2.5		0.875	1.02	0.145	6.81
		Subject 8	0.573	4.05	3.477	6.51	2.46	6.48	-0.03	6.69	6.69	6.15	6.09		22.7	22.8	0.1		0.819	1.07	0.251	7
		Subject 9	1.4	4.29	2.89	8.19	3.9	8.43	0.24	8.43	8.22	7.56	7.86		33.9	31.2	-2.7		1.04	1.06	0.02	7
		MEAN	0.9815	3.64544	2.62856	5.99667	2.35122	6.41222	0.415556	6.74778	6.43011	6.12429	5.42238		26.8222	24.3444	-2.47778		0.875556	1.026	0.150444	6.81222
		SD	0.295871	1.17186	1.08406	2.29723	1.39806	2.31733	0.273501	2.3671	2.31166	2.1953	2.49616		4.90937	3.79114	3.07237		0.11029	0.223493	0.19638	1.17094

## Sheet: CARACTERIZATION
				Age		Height		Body Mass		Practice time		VO2max		VO2max		iVO2max		HRmax
	Subject 1			16		162		59.7		5						37		199
	Subject 2			16		174		62.6		11						37		201
	Subject 3			22		180		81.4		11						28
	Subject 4			23		180		92.45		16						25		192
	Subject 5			16		157		47.1		5						49		201
	Subject 6			17		166		55								43
	Subject 7			28		169.5		58.2		17		59.2		3432		28		189
	Subject 8			18		174		67.5		10						40
	Subject 9			26		173		71		20						28
	MEAN			20.2222		170.611		66.1056		11.875		59.2		3432		35		196.4
	SD			4.65773		7.80135		13.9383		5.46253		#DIV/0!		#DIV/0!		8.21584		5.54977
	MINIMUM			16		157		47.1		5
	MAXIMUM			28		180		92.45		20

## Sheet: VO2
				ROUND 1				ROUND 2				ROUND 3
	VO2máxREL	VO2máxABS		VO2máx.round	VO2máx.round	%max reached		VO2máx.round	VO2máx.round	%max reached		VO2máx.round	VO2máx.round	%max reached
Subject 1	65	3880		53.2	3176	0.818557		51.9	3096	0.797938		53.6	3198	0.824227
Subject 2	65	4068		52.1	3262	0.801868		54	3380	0.830875		56.7	3550	0.872665
Subject 3	45.6	3708		46.5	3784	1.0205		42.3	3446	0.929342		44.4	3618	0.975728
Subject 4	49.2	4550		44.5	4114	0.904176		38.3	3544	0.778901		39.2	3626	0.796923
Subject 5	70.8	3334		55.9	2634	0.790042		58.5	2754	0.826035		61.7	2904	0.871026
Subject 6	57.1	3084		44.2	2364	0.766537		51.7	2764	0.896239		49	2622	0.850195
Subject 7	59.2	3432		41.6	2410	0.702214		45.3	2630	0.766317		44.4	2578	0.751166
Subject 8	61.3	4140		47.1	3178	0.767633		49.8	3362	0.812077		47.7	3220	0.777778
Subject 9	52.9	3758		50	3548	0.944119		48.4	3434	0.913784		49.7	3526	0.938265
MEAN	58.4556	3772.67		48.3444	3163.33	0.835071		48.9111	3156.67	0.839056		49.6	3204.67	0.850886
SD	8.14188	450.703		4.74213	605.569	0.100839		6.17403	353.568	0.0597602		6.88331	417.398	0.0733253
					3.16333				3.15667				3.20467
					0.605569				0.353568				0.417398
				ROUND 1				ROUND 2				ROUND 3
	VO2máxREL	VO2máxABS		VO2máx.round	VO2máx.round	%max reached		VO2máx.round	VO2máx.round	%max reached		VO2máx.round	VO2máx.round	%max reached
Subject 1	65	3880		54.3	3240	0.835052		58.1	3470	0.89433		54.5	3254	0.83866
Subject 2	65	4068		59.2	3706	0.911013		54.5	3410	0.83825		54.9	3438	0.845133
Subject 3	45.6	3708		41.4	3366	0.907767		39.4	3208	0.865156		38.9	3164	0.85329
Subject 4	49.2	4550		39	3604	0.792088		46.4	4292	0.943297		49.9	4614	1.01407
Subject 5	70.8	3334		54.9	2588	0.776245		57	2684	0.805039		60.6	2856	0.856629
Subject 6	57.1	3084		55	2972	0.963684		51.6	2786	0.903372		55.9	3020	0.979248
Subject 7	59.2	3432		39.9	2316	0.674825		42.2	2448	0.713287		45.4	2634	0.767483
Subject 8	61.3	4140		53.1	3582	0.865217		57.2	3862	0.93285		3886	3544	0.856039
Subject 9	52.9	3758		51.5	3660	0.973922		54.3	3858	1.02661		52.7	3744	0.996275
MEAN	58.4556	3772.67		49.8111	3226	0.855535		51.1889	3335.33	0.880243		477.644	3363.11	0.889647
SD	8.14188	450.703		7.58822	500.978	0.0968242		6.9028	614.314	0.0897365		1278.15	581.611	0.0850917
				ROUND 1				ROUND 2				ROUND 3
	VO2máxREL	VO2máxABS		VO2máx.round	VO2máx.round	%max reached		VO2máx.round	VO2máx.round	%max reached		VO2máx.round	VO2máx.round	%max reached
Subject 1	65	3880		48.6	2904	0.748454		45.5	2714	0.699485		50.4	3008	0.775258
Subject 2	65	4068		41.4	2572	0.632252		47.9	2974	0.731072		50.1	3114	0.765487
Subject 3	45.6	3708		36	2928	0.789644		35.5	2892	0.779935		36.5	2970	0.800971
Subject 4	49.2	4550		37.5	3464	0.761319		39.8	3678	0.808352		40.1	3706	0.814505
Subject 5	70.8	3334		43.1	2028	0.608278		48.9	2304	0.691062		52.9	2490	0.746851
Subject 6	57.1	3084		45.6	2460	0.797665		54.3	2930	0.950065		53.3	2876	0.932555
Subject 7	59.2	3432		41.9	2763	0.80507		46,6	3057,8	0.890967		48,1	3149,3	0.917628
Subject 8	61.3	4140		47	3170	0.7657		49.5	3340	0.806763		47.3	3190	0.770531
Subject 9	52.9	3758		36.3	2578	0.686003		51.1	3630	0.965939		54.1	3840	1.02182
MEAN	58.4556	3772.67		41.9333	2763	0.732709		46.5625	3057.75	0.813738		48.0875	3149.25	0.838401
SD	8.14188	450.703		4.63411	448.314	0.0729794		6.15953	467.357	0.102391		6.48701	439.377	0.0955562
